# Supplementary material for: Radiogenic and stable Ce isotope measurements by thermal ionisation mass spectrometry
Source: Royal Society of Chemistry journal article supplement (doi:10.1039/c8ja00362a), 2019-01-01
Supplement: c8ja00362a1.xlsx [file c8ja00362a1.xlsx]

## Sheet: LMV-Ce-config#3
sample name	config #	142Ce16O (V)	138Ce/142Ce	2 s.d.	138Ce/136Ce	2 s.d.	ε138CeLMV	2 s.d.	140Ce/142Ce	2 s.d.	tailing
LMV Ce	3	10.3959	0.0225706	2.19487e-07	1.33712	1.30028e-05	0.039982	0.0972445	N/A	N/A	0.793899
LMV Ce	3	7.72602	0.0225704	2.93257e-07	1.33711	1.73731e-05	-0.0562282	0.129929	N/A	N/A	0.744105
LMV Ce	3	8.71111	0.0225703	2.69181e-07	1.3371	1.59467e-05	-0.113825	0.119262	N/A	N/A	0.753683
LMV Ce	3	10.7722	0.0225704	2.34855e-07	1.33711	1.39132e-05	-0.0639988	0.104054	N/A	N/A	0.781676
LMV Ce	3	7.02691	0.0225706	3.56478e-07	1.33712	2.11184e-05	0.0487116	0.157939	N/A	N/A	0.816189
LMV Ce	3	8.22623	0.0225702	3.21811e-07	1.3371	1.90647e-05	-0.134042	0.14258	N/A	N/A	0.742603
LMV Ce	3	8.20734	0.0225701	2.66309e-07	1.33709	1.57766e-05	-0.197838	0.117989	N/A	N/A	0.692759
LMV Ce	3	11.5246	0.02257	2.14841e-07	1.33708	1.27276e-05	-0.239164	0.0951863	N/A	N/A	0.817248
LMV Ce	3	9.72903	0.0225704	2.34921e-07	1.33711	1.39171e-05	-0.0629544	0.104083	N/A	N/A	0.739961
LMV Ce	3	12.7215	0.0225706	2.03743e-07	1.33712	1.20701e-05	0.0264777	0.0902692	N/A	N/A	0.765213
LMV Ce	3	11.032	0.0225703	2.39006e-07	1.3371	1.41591e-05	-0.11443	0.105893	N/A	N/A	0.656227
LMV Ce	3	11.5117	0.0225703	2.04818e-07	1.33711	1.21338e-05	-0.0845643	0.0907455	N/A	N/A	0.635838
LMV Ce	3	11.7254	0.0225704	2.24929e-07	1.33711	1.33252e-05	-0.0689931	0.0996555	N/A	N/A	0.681517
LMV Ce	3	10.5411	0.0225704	2.35733e-07	1.33711	1.39652e-05	-0.0645553	0.104442	N/A	N/A	0.707817
LMV Ce	3	12.293	0.0225705	1.95882e-07	1.33711	1.16044e-05	-0.0305422	0.0867865	N/A	N/A	0.706215
LMV Ce	3	11.3698	0.0225701	2.29457e-07	1.33709	1.35934e-05	-0.184012	0.101662	N/A	N/A	0.738247
LMV Ce	3	10.3544	0.0225701	2.3597e-07	1.33709	1.39793e-05	-0.173005	0.104547	N/A	N/A	0.900448
LMV Ce	3	10.153	0.0225701	1.96643e-07	1.33709	1.16495e-05	-0.203793	0.0871236	N/A	N/A	0.818258
LMV Ce	3	8.54087	0.0225704	2.64678e-07	1.33711	1.568e-05	-0.0525884	0.117267	N/A	N/A	0.720553
LMV Ce	3	9.62539	0.0225699	2.16824e-07	1.33708	1.2845e-05	-0.278472	0.0960646	N/A	N/A	0.817897
LMV Ce	3	8.60953	0.0225705	2.40357e-07	1.33712	1.42392e-05	0.00540116	0.106491	N/A	N/A	0.75328
LMV Ce	3	8.30124	0.0225706	2.29622e-07	1.33712	1.36032e-05	0.031793	0.101735	N/A	N/A	0.716766
LMV Ce	3	9.0728	0.0225702	2.13834e-07	1.3371	1.26679e-05	-0.129476	0.0947398	N/A	N/A	0.793693
LMV Ce	3	9.12837	0.0225709	2.64852e-07	1.33714	1.56903e-05	0.184803	0.117344	N/A	N/A	0.728133
LMV Ce	3	13.4611	0.0225705	1.79998e-07	1.33711	1.06634e-05	-0.0113126	0.0797488	N/A	N/A	0.75591
LMV Ce	3	10.9543	0.0225704	1.45438e-07	1.33711	8.61602e-06	-0.0430338	0.0644371	N/A	N/A	0.775065
LMV Ce	3	6.98888	0.0225709	2.78266e-07	1.33714	1.6485e-05	0.179163	0.123287	N/A	N/A	0.619436
LMV Ce	3	12.914	0.0225705	1.88946e-07	1.33711	1.11935e-05	-0.021087	0.0837132	N/A	N/A	0.709316
LMV Ce	3	11.8896	0.0225708	2.02061e-07	1.33713	1.19704e-05	0.125633	0.089524	N/A	N/A	0.66863
LMV Ce	3	11.574	0.0225706	2.03282e-07	1.33712	1.20428e-05	0.0473703	0.0900651	N/A	N/A	0.724472
LMV Ce	3	6.83428	0.0225711	2.65438e-07	1.33715	1.5725e-05	0.233827	0.117603	N/A	N/A	0.642498
LMV Ce	3	10.0094	0.0225707	2.08706e-07	1.33713	1.23641e-05	0.0900161	0.0924682	N/A	N/A	0.691016
LMV Ce	3	10.5989	0.0225705	2.26886e-07	1.33712	1.34411e-05	-0.010435	0.100523	N/A	N/A	0.653152
LMV Ce	3	10.5171	0.0225707	2.02937e-07	1.33712	1.20223e-05	0.0604082	0.089912	N/A	N/A	0.862501
LMV Ce	3	9.9103	0.0225706	2.25146e-07	1.33712	1.3338e-05	0.031597	0.0997518	N/A	N/A	0.746964
LMV Ce	3	11.0608	0.0225706	2.08665e-07	1.33712	1.23617e-05	0.0399454	0.0924499	N/A	N/A	0.798488
LMV Ce	3	9.67124	0.0225706	2.21045e-07	1.33712	1.30951e-05	0.02851	0.097935	N/A	N/A	0.597724
LMV Ce	3	7.58407	0.0225712	3.00417e-07	1.33716	1.77972e-05	0.298482	0.133101	N/A	N/A	0.823609
LMV Ce	3	7.91366	0.022571	2.73343e-07	1.33715	1.61933e-05	0.223481	0.121106	N/A	N/A	0.781028
LMV Ce	3	7.41207	0.0225713	2.9073e-07	1.33716	1.72233e-05	0.35953	0.128809	N/A	N/A	0.737751
LMV Ce	3	9.82165	0.0225707	2.26435e-07	1.33713	1.34144e-05	0.0641357	0.100323	N/A	N/A	0.677879
LMV Ce	3	8.81282	0.0225706	2.27156e-07	1.33712	1.34571e-05	0.0226391	0.100642	N/A	N/A	0.669274
LMV Ce	3	9.99717	0.0225705	2.09667e-07	1.33712	1.2421e-05	0.0107014	0.0928936	N/A	N/A	0.788028
LMV Ce	3	10.0402	0.0225708	2.05736e-07	1.33713	1.21881e-05	0.102923	0.091152	N/A	N/A	0.694316
LMV Ce	3	7.71148	0.0225707	2.56374e-07	1.33712	1.5188e-05	0.0554977	0.113588	N/A	N/A	0.751197
LMV Ce	3	9.37801	0.0225707	2.15389e-07	1.33713	1.276e-05	0.0641453	0.0954289	N/A	N/A	0.652558
LMV Ce	3	9.45895	0.0225703	2.25233e-07	1.3371	1.33432e-05	-0.0868677	0.0997904	N/A	N/A	0.661143
LMV Ce	3	10.5468	0.0225706	2.15223e-07	1.33712	1.27502e-05	0.0500425	0.0953554	N/A	N/A	0.831545
		48	0.0225705	6.014e-07	1.33712	3.5628e-05	-3.37693e-12	0.266454

## Sheet: LMV-Ce-config#4
sample name	config #	142Ce16O (V)	138Ce/142Ce	2 s.e.	138Ce/136Ce	2 s.e.	ε138CeLMV	2 s.e.	140Ce/142Ce	2 s.e.	tailing
LMV Ce	4	9.32128	0.0225706	2.20666e-07	1.33712	1.30726e-05	0.0282832	0.0977669	7.94406	2.50315e-05	0.706216
LMV Ce	4	8.6115	0.0225701	2.29347e-07	1.33709	1.35869e-05	-0.191786	0.101613	7.94395	2.36804e-05	0.752499
LMV Ce	4	9.22042	0.0225705	2.06825e-07	1.33711	1.22526e-05	-0.0267842	0.0916346	7.94404	2.43317e-05	0.704161
LMV Ce	4	9.53713	0.0225706	2.23377e-07	1.33712	1.32333e-05	0.039542	0.0989684	7.94394	2.74962e-05	0.669785
LMV Ce	4	8.6167	0.0225706	2.2477e-07	1.33712	1.33158e-05	0.0338089	0.0995855	7.94402	3.25338e-05	0.575744
LMV Ce	4	9.50932	0.022571	2.06518e-07	1.33714	1.22345e-05	0.192083	0.0914989	7.94387	2.74035e-05	0.953275
LMV Ce	4	12.584	0.0225706	1.96612e-07	1.33712	1.16476e-05	0.0192064	0.0871099	7.94392	2.92698e-05	0.715601
		7	0.0225706		1.33712		0.0134791
			5.11373e-07		3.02946e-05		0.226567

## Sheet: LMV-Ce-config#5
sample name	config #	142Ce16O (V)	138Ce/142Ce	2 s.e.	138Ce/136Ce	2 s.e.	ε138CeLMV	2 s.e.	140Ce/142Ce	2 s.e.	tailing
LMV Ce	5	2.16346	0.0225706	5.08437e-07	1.33712	3.01207e-05	0.0399862	0.225265	7.94416	5.82992e-05	0.850174
LMV Ce	5	2.66547	0.0225712	4.20689e-07	1.33716	2.49223e-05	0.295147	0.186388	7.94401	5.44072e-05	0.69112
LMV Ce	5	2.28015	0.0225703	4.84266e-07	1.33711	2.86887e-05	-0.0781615	0.214556	7.94412	5.65235e-05	0.636041
LMV Ce	5	2.40805	0.0225699	4.48011e-07	1.33708	2.65409e-05	-0.274986	0.198493	7.94419	5.2791e-05	0.696567
LMV Ce	5	1.73031	0.0225704	6.20685e-07	1.33711	3.67704e-05	-0.0703436	0.274997	7.94436	7.24483e-05	0.648464
LMV Ce	5	3.11666	0.0225711	3.97299e-07	1.33715	2.35367e-05	0.250201	0.176025	7.94407	4.71334e-05	0.748365
		6	0.0225706		1.33712		0.0269738
			9.75757e-07		5.78055e-05		0.432315

## Sheet: LMV-Ce-config#6
sample name	config #	142Ce16O (V)	138Ce/142Ce	2 s.e.	138Ce/136Ce	2 s.e.	ε138CeLMV	2 s.e.	140Ce/142Ce	2 s.e.
LMV Ce	6	2.63807	0.0225704	6.71906e-07	1.33711	3.98048e-05	-0.0745623	0.297694	7.94395	7.36067e-05
LMV Ce	6	2.66828	0.0225708	6.7689e-07	1.33713	4.01001e-05	0.115598	0.299902	7.94395	7.56503e-05
LMV Ce	6	3.50383	0.0225703	5.24984e-07	1.3371	3.11009e-05	-0.0873699	0.232599	7.94395	5.8964e-05
LMV Ce	6	2.72921	0.0225701	6.14795e-07	1.33709	3.64215e-05	-0.191675	0.272391	7.94399	7.14725e-05
LMV Ce	6	2.6797	0.0225709	6.37033e-07	1.33714	3.77389e-05	0.174682	0.282243	7.94399	7.23514e-05
LMV Ce	6	2.6797	0.0225709	6.37033e-07	1.33714	3.77389e-05	0.174682	0.282243	7.94399	7.23514e-05
LMV Ce	6	2.74367	0.0225714	5.71799e-07	1.33717	3.38743e-05	0.370114	0.253341	7.94407	6.63452e-05
LMV Ce	6	2.59524	0.02257	6.65663e-07	1.33708	3.9435e-05	-0.243088	0.294928	7.94413	7.649e-05
LMV Ce	6	2.91391	0.0225712	5.94958e-07	1.33716	3.52463e-05	0.313001	0.263602	7.94421	6.6674e-05
LMV Ce	6	2.62251	0.0225703	6.3707e-07	1.3371	3.77411e-05	-0.118554	0.282259	7.94407	7.53762e-05
		10	0.0225706		1.33712		0.0432828
			9.67805e-07		5.73344e-05		0.428792

## Sheet: AMES-Ce-config#1
sample name	config #	142Ce16O (V)	138Ce/142Ce	2 s.e.	138Ce/136Ce	2 s.e.	ε138CeLMV	2 s.e.	140Ce/142Ce	2 s.e.	tailing
AMES Ce	1	10.188	0.0225744	2.49814e-07	1.33735	1.47994e-05	1.71857	0.110662	N/A	N/A	0.886276
AMES Ce	1	10.4021	0.0225745	2.3283e-07	1.33735	1.37933e-05	1.75703	0.103139	N/A	N/A	0.868272
AMES Ce	1	10.5243	0.0225745	2.4844e-07	1.33735	1.4718e-05	1.77766	0.110054	N/A	N/A	0.85657
AMES Ce	1	8.97241	0.0225741	2.53662e-07	1.33733	1.50274e-05	1.56595	0.112367	N/A	N/A	0.888345
AMES Ce	1	10.6098	0.0225741	2.09699e-07	1.33733	1.24229e-05	1.5734	0.0928925	N/A	N/A	0.865648
		10.1393	0.0225743		1.33734		1.67852
			4.58792e-07		2.71796e-05		0.20327

## Sheet: AMES-Ce-config#2
sample name	config #	142Ce16O (V)	138Ce/142Ce	2 s.e.	138Ce/136Ce	2 s.e.	ε138CeLMV	2 s.e.	140Ce/142Ce	2 s.e.	tailing
AMES Ce	2	9.22528	0.0225742	2.52183e-07	1.33733	1.49398e-05	1.61214	0.111713	N/A	N/A	0.908514
AMES Ce	2	9.5662	0.0225742	2.25221e-07	1.33733	1.33425e-05	1.60904	0.0997695	N/A	N/A	0.87149
AMES Ce	2	7.12643	0.0225735	3.08565e-07	1.33729	1.82799e-05	1.33328	0.13669	N/A	N/A	0.925604
AMES Ce	2	11.0251	0.0225741	2.32172e-07	1.33733	1.37543e-05	1.59689	0.102849	N/A	N/A	0.915053
AMES Ce	2	9.32676	0.0225743	2.41882e-07	1.33734	1.43295e-05	1.68614	0.10715	N/A	N/A	0.86432
AMES Ce	2	9.48339	0.022574	2.19275e-07	1.33732	1.29902e-05	1.53266	0.0971354	N/A	N/A	0.822407
AMES Ce	2	10.4937	0.022574	2.06469e-07	1.33732	1.22316e-05	1.54063	0.0914626	N/A	N/A	0.902288
AMES Ce	2	10.1349	0.0225738	2.2232e-07	1.33731	1.31706e-05	1.43383	0.0984843	N/A	N/A	0.885696
AMES Ce	2	5.27758	0.0225737	2.99397e-07	1.3373	1.77368e-05	1.39246	0.132628	N/A	N/A	0.800075
AMES Ce	2	5.49849	0.022574	2.8743e-07	1.33732	1.70279e-05	1.52819	0.127327	N/A	N/A	0.877817
AMES Ce	2	8.74619	0.0225748	2.373e-07	1.33737	1.40581e-05	1.90281	0.10512	N/A	N/A	0.768704
AMES Ce	2	7.98031	0.0225745	2.73378e-07	1.33735	1.61954e-05	1.78165	0.121102	N/A	N/A	0.833639
AMES Ce	2	11.4821	0.0225747	2.35869e-07	1.33736	1.39733e-05	1.83141	0.104486	N/A	N/A	0.739755
AMES Ce	2	13.1268	0.0225744	2.02295e-07	1.33735	1.19843e-05	1.7174	0.0896133	N/A	N/A	0.74512
AMES Ce	2	8.07105	0.0225743	3.26367e-07	1.33734	1.93345e-05	1.65877	0.144575	N/A	N/A	0.791612
AMES Ce	2	9.05305	0.0225741	2.55475e-07	1.33733	1.51348e-05	1.56329	0.113171	N/A	N/A	0.801593
AMES Ce	2	10.3927	0.0225743	2.24818e-07	1.33734	1.33186e-05	1.66196	0.0995906	N/A	N/A	0.76526
AMES Ce	2	8.09878	0.0225746	2.59478e-07	1.33736	1.53719e-05	1.79843	0.114945	N/A	N/A	0.803811
AMES Ce	2	8.50526	0.022575	2.61029e-07	1.33738	1.54638e-05	1.96958	0.115632	N/A	N/A	0.801825
AMES Ce	2	7.3586	0.0225743	3.08656e-07	1.33734	1.82853e-05	1.65915	0.13673	N/A	N/A	0.811316
AMES Ce	2	11.1997	0.0225745	2.27776e-07	1.33735	1.34939e-05	1.77663	0.100901	N/A	N/A	0.670308
AMES Ce	2	10.9213	0.0225744	2.32331e-07	1.33735	1.37637e-05	1.73791	0.102919	N/A	N/A	0.756732
AMES Ce	2	11.489	0.0225743	2.15434e-07	1.33734	1.27627e-05	1.68407	0.095434	N/A	N/A	0.749272
AMES Ce	2	13.8492	0.0225743	1.95706e-07	1.33734	1.15939e-05	1.68471	0.0866945	N/A	N/A	0.757664
AMES Ce	2	11.1887	0.0225743	2.13432e-07	1.33734	1.26441e-05	1.68997	0.0945469	N/A	N/A	0.70862
		25	0.0225743		1.33734		1.65532
			6.76409e-07		4.00716e-05		0.299687

## Sheet: AMES-Ce-config#4
sample name	config #	142Ce16O (V)	138Ce/142Ce	2 s.e.	138Ce/136Ce	2 s.e.	ε138CeLMV	2 s.e.	140Ce/142Ce	2 s.e.	tailing
AMES Ce	4	9.04403	0.0225745	2.18278e-07	1.33735	1.29311e-05	1.7807	0.096692	7.94422	2.47389e-05	0.519732
AMES Ce	4	9.9871	0.0225746	2.03722e-07	1.33736	1.20688e-05	1.82637	0.0902442	7.94408	2.19455e-05	0.603583
AMES Ce	4	9.92335	0.0225746	2.03115e-07	1.33736	1.20329e-05	1.80784	0.0899754	7.94422	2.37244e-05	0.760583
AMES Ce	4	10.0734	0.0225745	2.13998e-07	1.33735	1.26776e-05	1.75499	0.094796	7.94401	2.40507e-05	0.646307
AMES Ce	4	11.1562	0.0225746	1.98933e-07	1.33736	1.17851e-05	1.81908	0.0881227	7.94428	2.61829e-05	0.699748
		10.0368	0.0225746		1.33736		1.79779
			1.33427e-07		7.90445e-06		0.0591157
